1 **The ribbon architecture of the Golgi apparatus is not restricted to**  
2 **vertebrates**

3

4 **Authors**

5 Giovanna Benvenuto, Maria Ina Arnone, Francesco Ferraro\*

6

7 **Author affiliation**

8 Department of Biology and Evolution of Marine Organisms (BEOM), Stazione

9 Zoologica Anton Dohrn; Villa Comunale 80121 Naples, Italy

10

11 Giovanna Benvenuto, ORCID: <https://orcid.org/0000-0001-7155-2935>

12 Maria Ina Arnone, ORCID: <https://orcid.org/0000-0002-9012-7624>

13 Francesco Ferraro, ORCID: <https://orcid.org/0000-0002-6199-637X>

14

15 \* Correspondence: [francesco.ferraro@szn.it](mailto:francesco.ferraro@szn.it)

16

17 **Keywords**

18 Golgi apparatus

19 Golgi ribbon

20 Sea urchin

21

22 **Abstract**

23 The Golgi apparatus plays a central role as a processing and sorting station  
24 along the secretory pathway. In multicellular organisms, this organelle  
25 displays two structural organizations, whereby its functional subunits, the  
26 mini-stacks, are either dispersed throughout the cell or linked into a  
27 centralized structure, called Golgi “ribbon”. The Golgi ribbon is considered to  
28 be a feature typical of vertebrate cells. Here we report that this is not the case.  
29 We show that sea urchin embryonic cells assemble Golgi ribbons during early  
30 development. Sea urchins are deuterostomes, the bilaterian animal clade to  
31 which chordates, and thus vertebrates, also belong.  
32 Far from being a structural innovation of vertebrates, the Golgi ribbon  
33 therefore appears to be an ancient cellular feature evolved before the split  
34 between echinoderms and chordates. Evolutionary conservation of the ribbon  
35 architecture surmises that it must play fundamental roles in the biology of  
36 deuterostomes.

37

## 38 Introduction

39 In April 1898, Camillo Golgi reported to the Medical–Surgical Society of Pavia,  
40 his discovery of an intracellular structure in the neurons of the barn owl *Tytus*  
41 *alba*. In Golgi’s words, this structure appeared as “a fine and elegant network  
42 within the cell body ... completely internal in the nerve cells ... The distinctive  
43 appearance of this *internal reticular apparatus* is attributable to the prevalence  
44 of *ribbon-like threads*, their manner of dividing, their anastomoses, and the  
45 pathways formed by them...” (italics are ours)<sup>1</sup>. Golgi’s “internal reticular  
46 apparatus” later became known as Golgi apparatus or complex. With the  
47 advent of molecular tools and the transformation of classical cytology into  
48 experimental cell biology, the Golgi complex was shown to be central in the  
49 processing and sorting of secretory cargos<sup>2,3</sup>. The ribbon organization of the  
50 Golgi apparatus is believed to be typical of vertebrates, since in other  
51 multicellular organisms, such as flies, worms and plants, Golgi mini-stacks are  
52 dispersed throughout the cell cytoplasm<sup>4-7</sup>. The functional importance of the  
53 Golgi ribbon remains elusive. Here, we report that the Golgi ribbon is present  
54 in sea urchins. This observation indicates that whatever functions the Golgi  
55 ribbon might play they are not specific to vertebrate biology.

56

## 57 Results

58 Published evidence is suggestive that in sea urchin embryos the Golgi  
59 complex can acquire a centralized morphology reminiscent of the ribbon  
60 structure observed in vertebrate cells<sup>8,9</sup>. These studies prompted us to  
61 analyse Golgi dynamics in the developing embryos of the Mediterranean sea  
62 urchin, *Paracentrotus lividus*.

63 Immediately after fertilization, *P. lividus* zygotes were microinjected with *in*  
64 *vitro* transcribed mRNAs encoding fluorescent reporters of the Golgi  
65 apparatus and the plasma membrane (see “Materials and methods” section).  
66 Embryos were then allowed to develop at 18 °C and imaged by confocal  
67 microscopy at different stages.

68 At early developmental stages (2 and 4 hours post-fertilization, hpf) the Golgi  
69 apparatus is present as separated elements. Between 6 and 8 hpf these  
70 elements begin to coalesce into larger Golgi structures, forming a single Golgi  
71 object per cell by 10 hpf (Figure 1). Single, centralized Golgi apparatuses

72 were observed in embryonic cells at later developmental stages, up to the  
73 free-swimming larva, the pluteus (Figure S1A). To validate correct localization  
74 of our Golgi reporter EFGP\_Giant-CT, we carried out co-microinjections of its  
75 mRNA and that of GalT\_mCherry, encoding a commonly used fluorescently  
76 tagged Golgi targeting peptide from human galactosyl-transferase<sup>9,10</sup>. Indeed,  
77 the two fluorescent reporters co-localized to the same cellular structures,  
78 indicating that the C-terminal region of human Giantin (Giant-CT) correctly  
79 localizes to Golgi membranes (Figure S2). Of note, higher magnification  
80 imaging of embryos at stages following the observed clustering showed a  
81 morphology strongly reminiscent that of the Golgi ribbon observed in  
82 mammalian cells (Figure S1B).

83 Quantification of the size of Golgi elements during early development (2 to 10  
84 hpf) confirmed clustering of Golgi elements, while the number of Golgi  
85 elements per embryo displayed a drastic reduction at 8 hpf (Figure 2). Time-  
86 lapse confocal microscopy showed that small Golgi elements gradually  
87 clustered into larger structures, ultimately forming a single Golgi apparatus  
88 per cell at 8.30 to 9.30 hpf (Figure 3). Interestingly, Golgi elements appeared  
89 to be disassembled in cells undergoing mitosis, similar to what observed in  
90 mammalian cells<sup>11,12</sup> (Figure 3).

91 While our confocal microscopy results were suggestive of ribbon formation in  
92 sea urchin embryos, we could not rule out that the observed centralized Golgi  
93 apparatuses are the result of clustering of mini-stacks but not their physical  
94 connection as in mammalian cells<sup>13-15</sup>. In order to ascertain that adjacent mini-  
95 stacks do connect to each other forming a true Golgi ribbon, sea urchin  
96 embryos were analyzed by electron microscopy. At 2 hpf, the Golgi was  
97 present as separate mini-stacks, whereas at 10 hpf mini-stacks were linked to  
98 each other in a typical ribbon arrangement (Figure 4). Electron microscopy  
99 thus confirms that early in development, the Golgi apparatus organization of  
100 the sea urchin switches from the typical invertebrate arrangement with  
101 separate mini-stacks to the vertebrate-like ribbon architecture.

102

## 103 **Discussion**

104 The Golgi apparatus plays a central role in the processing and sorting of  
105 secretory cargoes. While this biosynthetic function remains the most actively

106 investigated<sup>2,3,16</sup>, recently published evidence shows that the Golgi actively  
107 participates in a number of secretion-independent cellular processes, such as  
108 stress sensing and signaling, apoptosis, autophagy and innate immunity<sup>17-28</sup>.  
109 The Golgi's functional unit is the mini-stack, thus named because it is formed  
110 by a pile of flat membrane cisternae. Mini-stacks display polarization of the  
111 machinery necessary to the processing and traffic of cargo molecules from  
112 the *cis*- to the *trans*-side: the Golgi entry and exit sites, respectively.  
113 Phylogenetic analysis shows that domain functionalization within mini-stacks  
114 was already present in the last eukaryotic common ancestor<sup>29</sup>. Two different  
115 structural organizations of the Golgi apparatus have been described in  
116 animals. In invertebrates, the Golgi is a multi-copy organelle with separate  
117 mini-stacks dispersed throughout the cell cytoplasm; an organization seen  
118 also in plants<sup>6,7</sup>. In vertebrates, instead, the mini-stacks coalesce into a  
119 centralized structure, referred to as the Golgi "ribbon" after Camillo Golgi's  
120 description, due to its appearance in optical microscopy. To date, the  
121 biological roles of the Golgi ribbon remain essentially unclear<sup>30-32</sup>. However,  
122 proliferating cells disassemble and reassemble the ribbon at each cell cycle,  
123 in a precisely timed and metabolically expensive process<sup>11,33</sup>; this level of  
124 regulation indicates that the ribbon architecture was evolutionarily selected  
125 and therefore must be functionally important. This conclusion is supported by  
126 the existence of pathologies in which ribbon breakdown (often referred to as  
127 Golgi "fragmentation") is a hallmark<sup>20</sup>. Most notable among these are  
128 neurodegenerative diseases. For instance, in animal models of Amyotrophic  
129 Lateral Sclerosis (ALS), Golgi fragmentation precedes phenotypic  
130 manifestations, and in cellular models of Alzheimer's it promotes A $\beta$  peptide  
131 production<sup>34-36</sup>. Based on evidence from cultured mammalian cells, the Golgi  
132 ribbon has been proposed to mediate a variety of exocytic functions. Among  
133 these are polarized secretion, directional cell migration, Golgi enzyme  
134 homogeneity, secretion of large cargos and production of Weibel-Palade  
135 bodies, large endothelial secretory granules<sup>37-41</sup>. However, these  
136 hypothesized functions of the ribbon often have not been confirmed by further  
137 analyses. For instance, a study found the ribbon not necessary for the  
138 homogenous distribution of glycosylation enzymes across mini-stacks<sup>42</sup>. Also,  
139 repositioning of the Golgi ribbon towards the leading edge of migrating cells

140 observed in 2D-cultures<sup>37,38</sup> was neither observed in cells forced to migrate in  
141 an *in vitro* 3D-mimicking environment or *in vivo*<sup>43</sup>. Ribbon disassembly slows  
142 but does not block secretion of the large cargo collagen<sup>40</sup>. And, finally, the  
143 size of endothelial-specific secretory granules, the Weibel-Palade Bodies, is  
144 certainly controlled by ribbon integrity<sup>41,44</sup>, but this process is clearly a cell  
145 type-specific requirement that does not explain why most vertebrate cells  
146 make a ribbon. It is also worth considering that cells of invertebrate animals,  
147 plants and even unicellular eukaryotes have similar secretory requirements to  
148 vertebrate cells but do not make Golgi ribbons. Directional cell migration, for  
149 instance, is essential for developmental morphogenesis and wound healing of  
150 animals, including those with dispersed mini-stack Golgi architecture, such as  
151 flies and worms<sup>45</sup>. In conclusion, the biological activities so far proposed lack  
152 explanatory power and the functions that the Golgi ribbon mediates as a  
153 cellular structure remain an enigma.

154 Here, we report that, contrary to current consensus, the Golgi ribbon is not  
155 restricted to vertebrate cells. Morphological data published on sea urchins  
156 were suggestive that this might be the case<sup>8,9</sup>, prompting us to investigate  
157 Golgi dynamics in the Mediterranean sea urchin, *Paracentrotus lividus*. In *P.*  
158 *lividus* embryos the Golgi is initially present in the typical ‘invertebrate’  
159 arrangement, as dispersed mini-stacks. At subsequent stages, ribbon  
160 assembly gradually occurs and is completed by the pre-hatching blastula  
161 stage (at 10 hours hpf), persisting throughout later development, up to the  
162 free-swimming pluteus larva. Sea urchins belong to the phylum  
163 Echinodermata, early branching deuterostomes evolutionarily related to  
164 chordates and therefore vertebrates. Ribbon assembly during sea urchin  
165 development implies that: (a) this Golgi arrangement is ancient, having  
166 evolved at least before the common ancestor of deuterostomes, more than  
167 0.6 gigayears ago; and (b) it must play some fundamental biological role(s),  
168 as it was conserved during evolution from sea urchins to humans.  
169 Interestingly, Golgi ribbon formation in early embryos is observed also in  
170 mammals. In mouse blastomeres, the Golgi is formed by separate elements,  
171 likely mini-stacks, that cluster by the blastocyst stage<sup>46</sup>. Formation of the  
172 Golgi ribbon in embryonic cells thus occurs at early developmental stages in

173 both sea urchins and mammals and may indicate that this centralized Golgi  
174 organization plays a role during embryogenesis.

175

## 176 **Materials and Methods**

177 **Animals.** *P. lividus* adults were sourced from the Gulf of Naples and  
178 maintained at 18 °C in dedicated aquaria at the Stazione Zoologica Anton  
179 Dohrn. Gametes were obtained by vigorous shaking. For each experiment,  
180 gametes were collected from 2 to 3 males and females. Efficient fertilization  
181 was tested before proceeding to microinjections.

182

183 **Constructs.** Primers were designed using the NEBuilder tool  
184 (<http://nebuilder.neb.com/>). PCR reactions for amplicon generation were  
185 carried out with Q5 High-Fidelity DNA Polymerase (NEB, cat. no. M0491).

186 *pCineo\_EGFP\_Giant\_CT*. The plasmid encodes EGFP in frame with a linker  
187 sequence (GGGSGGGS) and the 69 C-terminal amino acids of human  
188 Giantin, which target the recombinant protein to Golgi membranes<sup>47</sup>. The  
189 EGFP coding sequence was amplified from pEGFP-N1 vector (Clontech) with  
190 the following primers: fwd,  
191 atacgactcactataggctagcATGGTGAGCAAGGGCGAG (lower case: pCineo  
192 sequence; upper case EGFP coding sequence); rev,  
193 acctgatccaccgccCTTGTACAGCTCGTCCATGC (lower case: GGGG coding  
194 sequence; upper case: EGFP coding sequence). The sequence encoding the  
195 69 C-terminal amino acids of human Giantin was amplified from human  
196 umbilical vein endothelial cell (HUVEC) cDNA with the following primers: fwd,  
197 *ctgtacaagggcggtggatcaggtggaggatctACTCCTATCATTGGCTC* (italics: EGFP  
198 coding sequence; lower case: GGGSGGGS linker coding sequence; upper  
199 case: Giantin coding sequence); rev,  
200 gaggtaccacgcgtgaatTCATTACTATAGATGGCCC (lower case: pCineo  
201 sequence; upper case: Giantin coding sequence and two stop codons).

202 *pCineo\_GalT\_mCherry*. A plasmid (the generous gift of Irina Kaverina,  
203 Vanderbilt School of Medicine) encoding the N-terminal 87 amino acids of  
204 galactosyl-transferase (GalT), which confer Golgi localization, in frame with  
205 mCherry<sup>10</sup> was used to amplify the GalT\_mCherry coding sequence using the  
206 following primers: fwd,

207 ttaatacgactcactataggctagcATGAGGCTTCGGGAGCCG (lower case: pCineo  
208 sequence; upper case: GatT coding sequence); rev,  
209 ctctagagggtaccacgcgtgaattcTTACTTGTACAGCTCGTCCATGC (lower case:  
210 pCineo sequence; upper case: GatT coding sequence).  
211 *pCineo\_mCherry\_CAAX*. The sequence encoding mCherry in frame with the  
212 polybasic sequence and CAAX motif of human K-Ras (GKKKKKKSKTKCVIM)  
213 for targeting to the plasma membrane was generated by amplification of  
214 mCherry using the pmCherry-N1 (Clontech) plasmid as template and the  
215 following primers: fwd,  
216 ttaatacgactcactataggctagcATGGTGAGCAAGGGCGAG (lower case: pCineo  
217 sequence; upper case: mCherry coding sequence); rev,  
218 ctctagagggtaccacgcgtgaattc*ttacataattacacactttgtctttgacttcttttcttttacc*CTTGT  
219 ACAGCTCGTCCATGC (lower case: pCineo sequence; italics: polybasic plus  
220 CAAX motif and stop codon coding sequence; upper case: mCherry coding  
221 sequence). Amplicons and pCineo plasmid (linearized by NheI/EcoRI  
222 digestion) were assembled using the NEBuilder HiFi DNA assembly cloning  
223 kit (New England Biolabs, cat. no.  
224 E5520), following the manufacturer instructions. Correct sequences were  
225 verified by Sanger sequencing.

226

227 ***In vitro* transcription.** Plasmids were linearized by digestion with NotI, a  
228 unique restriction site in the pCineo vector located downstream of the cloned  
229 sequences. One microgram of each linearized plasmid was used as template  
230 for *in vitro* transcription, using the mMESSAGING mMACHINE T7 transcription  
231 kit (Invitrogen, cat. No. AM1344). Purified mRNAs were resuspended in  
232 DEPC-MilliQ water, their concentration measured and their quality checked by  
233 agarose gel electrophoresis. mRNAs were aliquoted and stored at – 80 °C  
234 until used.

235

236 **Microinjections.** Eggs' jelly coat was eliminated by a short wash in acidic  
237 filtered sea water (1.5 mM citric acid in 0.22 µm filtered sea water, FSW). De-  
238 jellied eggs were then immobilized on 60 mm plastic dish lids pre-treated with  
239 1% protamine sulphate (Sigma-Aldrich, P4380) in FSW. Eggs were then



240 washed with FSW containing sodium para-amino benzoate (Sigma-Aldrich,  
241 A6928; 0.05% in FSW) to prevent hardening of the fertilization envelope. *In*  
242 *vitro* transcribed mRNAs were diluted to a final concentration of 300-500 ng/ $\mu$ l  
243 in 120 mM KCl/DEPC-water. Four to five pl of diluted mRNAs were injected  
244 per embryo, immediately after fertilization. Embryos were allowed to develop  
245 at 18 °C.

246

247 **Confocal microscopy.** At the indicated times post-fertilization, embryo  
248 development was stopped by incubation with 0.2% paraformaldehyde in FSW.  
249 This treatment kills embryos preserving EGFP and mCherry fluorescence.  
250 Since embryos were not properly fixed, imaging was carried out within 16 h of  
251 formaldehyde treatment. Embryos laid on bottom coverslip dishes containing  
252 FSW were imaged with an inverted 25x (NA 0.8) water immersion objective,  
253 using a Zeiss LSM700 system. Image stacks (z-step 1  $\mu$ m) were acquired.  
254 Only one third to one half of the embryo volumes could be imaged at early  
255 stages, likely due to the opacity of yolk granules. At later stages (prism and  
256 pluteus) embryos were transparent and their whole volume could be imaged.  
257 For live imaging experiments, eggs were laid in FWS containing bottom  
258 coverslip dishes pre-treated with protamine, fertilized and then immediately  
259 microinjected with fluorescent reporter encoding mRNAs. Imaging was carried  
260 out as described above. Image stacks (z-step 1  $\mu$ m) were acquired at 15 min  
261 intervals. Higher magnification imaging of embryos was carried out on  
262 EGFP\_Giant-CT microinjected embryos using a 40x (NA 1.10) water  
263 immersion objective with a Leica SP8 confocal system. For presentation  
264 purposes, contrast-enhancement and Gaussian-blur filtering were carried out  
265 (ImageJ) to the images shown.

266

267 **Image analysis.** Images were opened as max\_int projections in ImageJ  
268 (<https://imagej.nih.gov/ij/>). The Golgi channel (8-bit) was selected and  
269 processed as follows.

270 For 2 and 4 hpf embryos: 1) background subtraction (rolling ball method, set  
271 at 50); 2) background-subtracted images were duplicated; 3) one of the  
272 images was processed to find maxima (parameter adjusted for each image to  
273 identify the majority of Golgi objects); the output is segmented particles; 4) the

274 other image was subjected to thresholding (the value was adjusted to match  
275 Golgi object size) and then transformed into a binary image (binary>make  
276 binary); 5) the image output from step 3 was subjected to selection>create  
277 selection> copy; 6) the copied selection was pasted on binary image (step 4),  
278 then undo; 7) the pasted selection was then drawn (edit>draw) in order to  
279 separate the objects in the binary image, based on the segmentation; 8)  
280 edit>selection>select none, in order to eliminate the selection in the binary  
281 image; 9) objects in the segmented binary image were then counted and  
282 quantified (“analyze particles”; the area range was 0.25-4  $\mu\text{m}^2$ , based on tests  
283 of particle size).

284 For embryos from 6 hpf on: 1) open images as max\_int projections of the  
285 Golgi channel (8-bit); 2) background subtraction (rolling ball method, set at  
286 50); 3) threshold was set (best value to fit particle size) and then the image  
287 transformed from 8-bit into a binary (binary> make binary); 4) quantitation of  
288 the objects was then carried out (“analyze particles”, area range 0.25-infinite  
289  $\mu\text{m}^2$ ). The “analyze particles” command generates tables with numerical  
290 values related to the objects analyzed, including their “feret diameter”, which is  
291 the longest distance between two points within an object, and their area.  
292 Graphs and statistical analyses were generated with Prism version 9  
293 (Graphpad).

294

295 **Electron microscopy.** Sea urchin embryos maintained at 18 °C were  
296 collected at the indicated developmental stages and fixed at 4° C in 2%  
297 glutaraldehyde in FSW. After 24 h samples were first rinsed in FSW (6x 10  
298 min), then in MilliQ water (3x 10 min) and post fixed with 1% osmium tetroxide  
299 and 1.5% potassium ferrocyanide for 1h at 4° C. Samples were then rinsed  
300 five times with MilliQ, dehydrated in a graded ethanol series, further  
301 substituted by propylene oxide and embedded in Epon 812 (TAAB, TAAB  
302 Laboratories Equipment Ltd, Berkshire, UK) at room temperature for 1 d and  
303 polymerized at 60 °C for 2 d. Resin blocks were sectioned with a Ultracut UCT  
304 ultramicrotome (Leica, Vienna, Austria). Sections were placed on nickel grids  
305 and observed with a Zeiss LEO 912AB TEM (Zeiss, Oberkochen, Germany).

306

307 **Author contributions.** FF designed the study. FF, GB and MIA carried out  
308 experiments. FF wrote the manuscript.

309

310 **Conflict of interest.** The authors declare no conflict of interest.

311

312 **Acknowledgements.** This work was supported by Stazione Zoologica Anton  
313 Dohrn's intramural funding to FF.

314

## 315 **References**

316

317 1 Mazzarello, P., Garbarino, C. & Calligaro, A. How Camillo Golgi became  
318 "the Golgi". *FEBS Lett* **583**, 3732-3737, doi:10.1016/j.febslet.2009.10.018  
319 (2009).

320 2 Glick, B. S. & Nakano, A. Membrane traffic within the Golgi apparatus.  
321 *Annual review of cell and developmental biology* **25**, 113-132 (2009).

322 3 Jackson, C. L. Mechanisms of transport through the Golgi complex. *Journal of*  
323 *cell science* **122**, 443-452, doi:10.1242/jcs.032581 (2009).

324 4 Yano, H. *et al.* Distinct functional units of the Golgi complex in *Drosophila*  
325 cells. *Proceedings of the National Academy of Sciences of the United States of*  
326 *America* **102**, 13467-13472, doi:10.1073/pnas.0506681102 (2005).

327 5 Sato, M. *et al.* *Caenorhabditis elegans* SNAP-29 is required for organellar  
328 integrity of the endomembrane system and general exocytosis in intestinal  
329 epithelial cells. *Molecular biology of the cell* **22**, 2579-2587,  
330 doi:10.1091/mbc.E11-04-0279 (2011).

331 6 Staehelin, L. A. & Kang, B. H. Nanoscale architecture of endoplasmic  
332 reticulum export sites and of Golgi membranes as determined by electron  
333 tomography. *Plant Physiol* **147**, 1454-1468, doi:10.1104/pp.108.120618  
334 (2008).

335 7 Vildanova, M. S., Wang, W. & Smirnova, E. A. Specific organization of Golgi  
336 apparatus in plant cells. *Biochemistry (Mosc)* **79**, 894-906,  
337 doi:10.1134/S0006297914090065 (2014).

338 8 Eldon, E. D. *et al.* Localization of the sea urchin Spec3 protein to cilia and  
339 Golgi complexes of embryonic ectoderm cells. *Genes Dev* **4**, 111-122,  
340 doi:10.1101/gad.4.1.111 (1990).

341 9 Terasaki, M. Dynamics of the endoplasmic reticulum and golgi apparatus  
342 during early sea urchin development. *Molecular biology of the cell* **11**, 897-  
343 914 (2000).

- 344 10 Miller, P. M. *et al.* Golgi-derived CLASP-dependent microtubules control  
345 Golgi organization and polarized trafficking in motile cells. *Nat Cell Biol* **11**,  
346 1069-1080, doi:10.1038/ncb1920 (2009).
- 347 11 Corda, D., Barretta, M. L., Cervigni, R. I. & Colanzi, A. Golgi complex  
348 fragmentation in G2/M transition: An organelle-based cell-cycle checkpoint.  
349 *IUBMB life* **64**, 661-670, doi:10.1002/iub.1054 (2012).
- 350 12 Valente, C. & Colanzi, A. Mechanisms and Regulation of the Mitotic  
351 Inheritance of the Golgi Complex. *Frontiers in cell and developmental biology*  
352 **3**, 79, doi:10.3389/fcell.2015.00079 (2015).
- 353 13 Rambourg, A. & Clermont, Y. in *The Golgi Apparatus* (eds E.G. Berger & J.  
354 Roth) Ch. Three-dimensional structure of the Golgi apparatus in mammalian  
355 cells, 37-61 (Birkhäuser, Basel, 1997).
- 356 14 Ladinsky, M. S., Mastronarde, D. N., McIntosh, J. R., Howell, K. E. &  
357 Staehelin, L. A. Golgi structure in three dimensions: functional insights from  
358 the normal rat kidney cell. *The Journal of cell biology* **144**, 1135-1149 (1999).
- 359 15 Cole, N. B. S., C.L.; Sciaky, N.; Terasaki, M.; Edidin, M.; Lippincott-  
360 Schwartz, J. Diffusional mobility of Golgi proteins in membranes of living  
361 cells. *Science (New York, N.Y)* **273**, 797-801,  
362 doi:10.1126/science.273.5276.797 (1996).
- 363 16 Di Martino, R., Sticco, L. & Luini, A. Regulation of cargo export and sorting  
364 at the trans-Golgi network. *FEBS Lett* **593**, 2306-2318, doi:10.1002/1873-  
365 3468.13572 (2019).
- 366 17 DeBose-Boyd, R. A. & Ye, J. SREBPs in Lipid Metabolism, Insulin  
367 Signaling, and Beyond. *Trends Biochem Sci* **43**, 358-368,  
368 doi:10.1016/j.tibs.2018.01.005 (2018).
- 369 18 Taniguchi, M. & Yoshida, H. TFE3, HSP47, and CREB3 Pathways of the  
370 Mammalian Golgi Stress Response. *Cell structure and function* **42**, 27-36,  
371 doi:10.1247/csf.16023 (2017).
- 372 19 Sasaki, K. & Yoshida, H. Golgi stress response and organelle zones. *FEBS*  
373 *Lett* **593**, 2330-2340, doi:10.1002/1873-3468.13554 (2019).
- 374 20 Machamer, C. E. The Golgi complex in stress and death. *Frontiers in*  
375 *neuroscience* **9**, 421, doi:10.3389/fnins.2015.00421 (2015).
- 376 21 Baumann, J. *et al.* Golgi stress-induced transcriptional changes mediated by  
377 MAPK signaling and three ETS transcription factors regulate MCL1 splicing.  
378 *Molecular biology of the cell* **29**, 42-52, doi:10.1091/mbc.E17-06-0418  
379 (2018).
- 380 22 Chiu, R., Novikov, L., Mukherjee, S. & Shields, D. A caspase cleavage  
381 fragment of p115 induces fragmentation of the Golgi apparatus and apoptosis.  
382 *The Journal of cell biology* **159**, 637-648, doi:10.1083/jcb.200208013 (2002).

- 383 23 Mukherjee, S., Chiu, R., Leung, S. M. & Shields, D. Fragmentation of the  
384 Golgi apparatus: an early apoptotic event independent of the cytoskeleton.  
385 *Traffic (Copenhagen, Denmark)* **8**, 369-378, doi:10.1111/j.1600-  
386 0854.2007.00542.x (2007).
- 387 24 He, Q. *et al.* The Golgi Apparatus May Be a Potential Therapeutic Target for  
388 Apoptosis-Related Neurological Diseases. *Frontiers in cell and developmental*  
389 *biology* **8**, 830, doi:10.3389/fcell.2020.00830 (2020).
- 390 25 Tao, Y., Yang, Y., Zhou, R. & Gong, T. Golgi Apparatus: An Emerging  
391 Platform for Innate Immunity. *Trends Cell Biol* **30**, 467-477,  
392 doi:10.1016/j.tcb.2020.02.008 (2020).
- 393 26 Farber-Katz, S. E. *et al.* DNA damage triggers Golgi dispersal via DNA-PK  
394 and GOLPH3. *Cell* **156**, 413-427, doi:10.1016/j.cell.2013.12.023 (2014).
- 395 27 Eisenberg-Lerner, A. *et al.* Golgi organization is regulated by proteasomal  
396 degradation. *Nature communications* **11**, 409, doi:10.1038/s41467-019-14038-  
397 9 (2020).
- 398 28 Catara, G. *et al.* PARP1-produced poly-ADP-ribose causes the PARP12  
399 translocation to stress granules and impairment of Golgi complex functions.  
400 *Sci Rep* **7**, 14035, doi:10.1038/s41598-017-14156-8 (2017).
- 401 29 Barlow, L. D., Nyvltova, E., Aguilar, M., Tachezy, J. & Dacks, J. B. A  
402 sophisticated, differentiated Golgi in the ancestor of eukaryotes. *BMC biology*  
403 **16**, 27, doi:10.1186/s12915-018-0492-9 (2018).
- 404 30 Wei, J. H. & Seemann, J. Unraveling the Golgi ribbon. *Traffic (Copenhagen,*  
405 *Denmark)* **11**, 1391-1400 (2010).
- 406 31 Wei, J. H. & Seemann, J. Golgi ribbon disassembly during mitosis,  
407 differentiation and disease progression. *Curr Opin Cell Biol* **47**, 43-51,  
408 doi:10.1016/j.ceb.2017.03.008 (2017).
- 409 32 Nakamura, N., Wei, J. H. & Seemann, J. Modular organization of the  
410 mammalian Golgi apparatus. *Curr Opin Cell Biol* **24**, 467-474,  
411 doi:10.1016/j.ceb.2012.05.009 (2012).
- 412 33 Tang, D., Xiang, Y. & Wang, Y. Reconstitution of the cell cycle-regulated  
413 Golgi disassembly and reassembly in a cell-free system. *Nat Protoc* **5**, 758-  
414 772, doi:10.1038/nprot.2010.38 (2010).
- 415 34 Bellouze, S. *et al.* Stathmin 1/2-triggered microtubule loss mediates Golgi  
416 fragmentation in mutant SOD1 motor neurons. *Molecular neurodegeneration*  
417 **11**, 43, doi:10.1186/s13024-016-0111-6 (2016).
- 418 35 Rabouille, C. & Haase, G. Editorial: Golgi Pathology in Neurodegenerative  
419 Diseases. *Frontiers in neuroscience* **9**, 489, doi:10.3389/fnins.2015.00489  
420 (2015).

- 421 36 Joshi, G., Chi, Y., Huang, Z. & Wang, Y. Abeta-induced Golgi fragmentation  
422 in Alzheimer's disease enhances Abeta production. *Proceedings of the*  
423 *National Academy of Sciences of the United States of America* **111**, E1230-  
424 1239, doi:10.1073/pnas.1320192111 (2014).
- 425 37 Yadav, S., Puri, S. & Linstedt, A. D. A primary role for Golgi positioning in  
426 directed secretion, cell polarity, and wound healing. *Molecular biology of the*  
427 *cell* **20**, 1728-1736 (2009).
- 428 38 Bisel, B. *et al.* ERK regulates Golgi and centrosome orientation towards the  
429 leading edge through GRASP65. *The Journal of cell biology* **182**, 837-843,  
430 doi:10.1083/jcb.200805045 (2008).
- 431 39 Puthenveedu, M. A., Bachert, C., Puri, S., Lanni, F. & Linstedt, A. D. GM130  
432 and GRASP65-dependent lateral cisternal fusion allows uniform Golgi-  
433 enzyme distribution. *Nat Cell Biol* **8**, 238-248, doi:10.1038/ncb1366 (2006).
- 434 40 Lavieu, G. *et al.* The Golgi ribbon structure facilitates anterograde transport of  
435 large cargoes. *Molecular biology of the cell* **25**, 3028-3036,  
436 doi:10.1091/mbc.E14-04-0931 (2014).
- 437 41 Ferraro, F. *et al.* A two-tier Golgi-based control of organelle size underpins  
438 the functional plasticity of endothelial cells. *Developmental cell* **29**, 292-304,  
439 doi:10.1016/j.devcel.2014.03.021 (2014).
- 440 42 Marra, P. *et al.* The biogenesis of the Golgi ribbon: the roles of membrane  
441 input from the ER and of GM130. *Molecular biology of the cell* **18**, 1595-  
442 1608, doi:10.1091/mbc.e06-10-0886 (2007).
- 443 43 Pouthas, F. *et al.* In migrating cells, the Golgi complex and the position of the  
444 centrosome depend on geometrical constraints of the substratum. *Journal of*  
445 *cell science* **121**, 2406-2414, doi:10.1242/jcs.026849 (2008).
- 446 44 Ferraro, F. *et al.* Weibel-Palade body size modulates the adhesive activity of  
447 its von Willebrand Factor cargo in cultured endothelial cells. *Sci Rep* **6**, 32473,  
448 doi:10.1038/srep32473 (2016).
- 449 45 Petrie, R. J., Doyle, A. D. & Yamada, K. M. Random versus directionally  
450 persistent cell migration. *Nature reviews* **10**, 538-549, doi:10.1038/nrm2729  
451 (2009).
- 452 46 Kiyonari, H. *et al.* Dynamic organelle localization and cytoskeletal  
453 reorganization during preimplantation mouse embryo development revealed  
454 by live imaging of genetically encoded fluorescent fusion proteins. *Genesis*  
455 **57**, e23277, doi:10.1002/dvg.23277 (2019).
- 456 47 Yadav, S., Puthenveedu, M. A. & Linstedt, A. D. Golgin160 recruits the  
457 dynein motor to position the Golgi apparatus. *Developmental cell* **23**, 153-165,  
458 doi:10.1016/j.devcel.2012.05.023 (2012).
- 459

# Figure 1

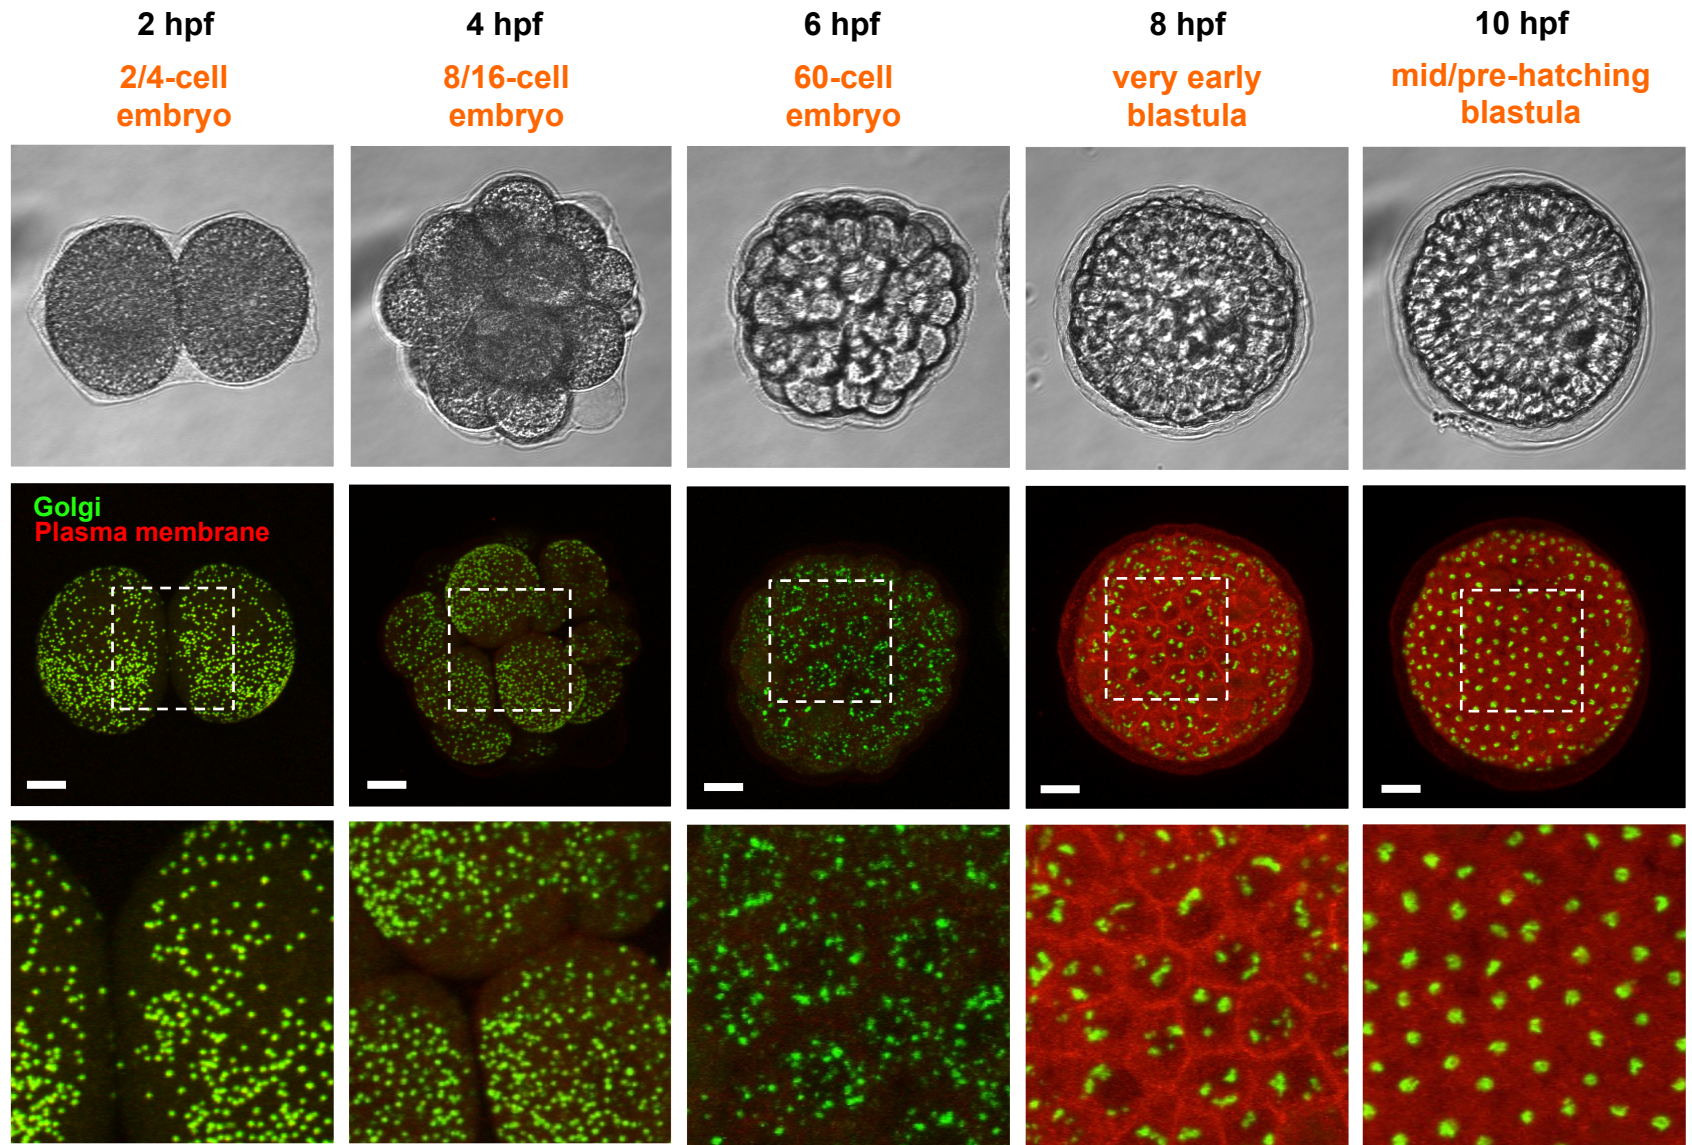

**Figure 1. Golgi dynamics during sea urchin development.** *P. lividus* zygotes were microinjected with mRNAs encoding fluorescent reporters of the Golgi apparatus (EGFP\_Giant-CT) and of the plasma membrane (mCherry\_CAAX) and allowed to develop at 18 °C. The indicated stages were imaged by bright field and confocal microscopy. Maximum intensity projections of image stacks are shown; bottom panels show magnifications of the middle panel insets. Scale bars: 20  $\mu$ m.

**Figure 2**

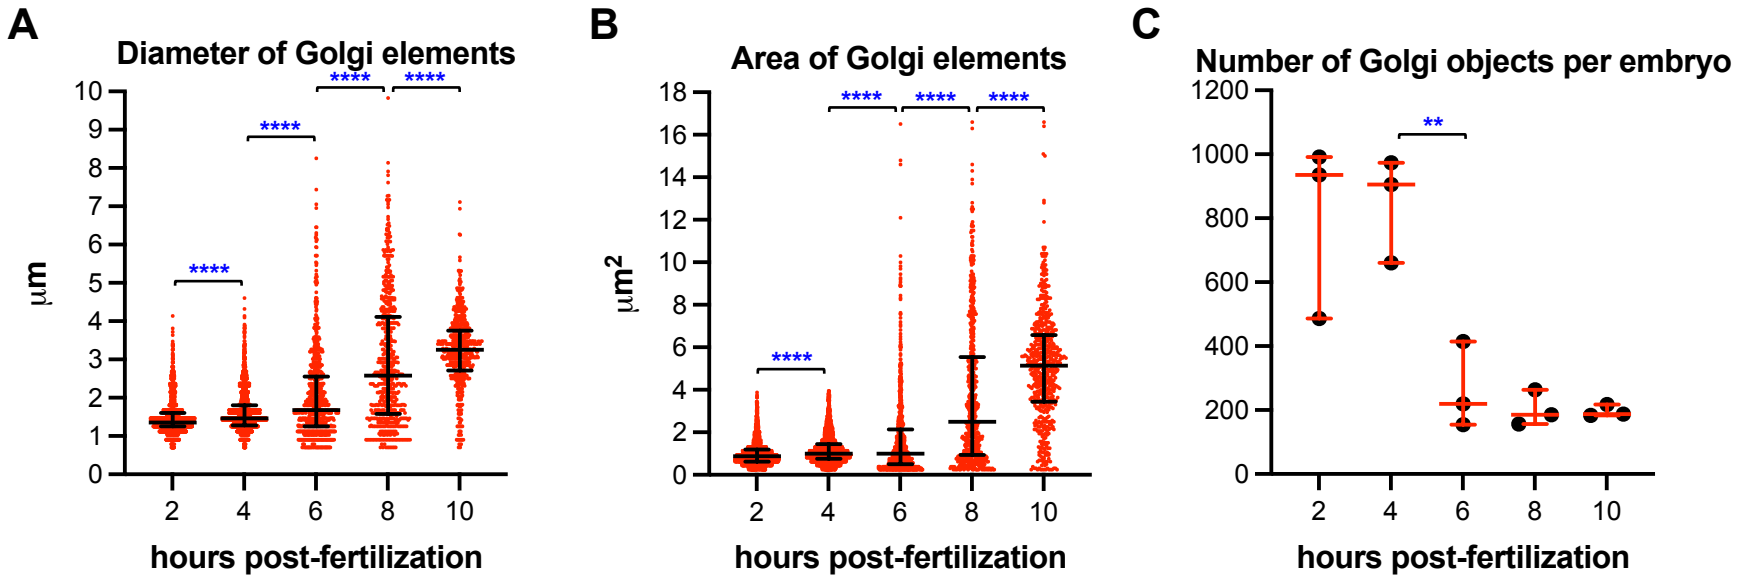

**Figure 2. Golgi element clustering during early sea urchin development.** The feret diameter (see “Materials and methods”), (A) and the area (B) of Golgi elements were quantified from three embryos per time point at 2 (N = 2274), 4 (N = 2538), 6 (N = 787), 8 (N = 604) and 10 hpf (N = 587); \*\*\*\*,  $p < 0.0001$ , Kolmogorov-Smirnov test. (C) Number of Golgi elements imaged per embryo; note that only part of the embryos could be imaged (see text) and these numbers thus underestimate the total number of Golgi objects; \*\*,  $p < 0.01$ , unpaired Student’s t-test.



**Figure 3**

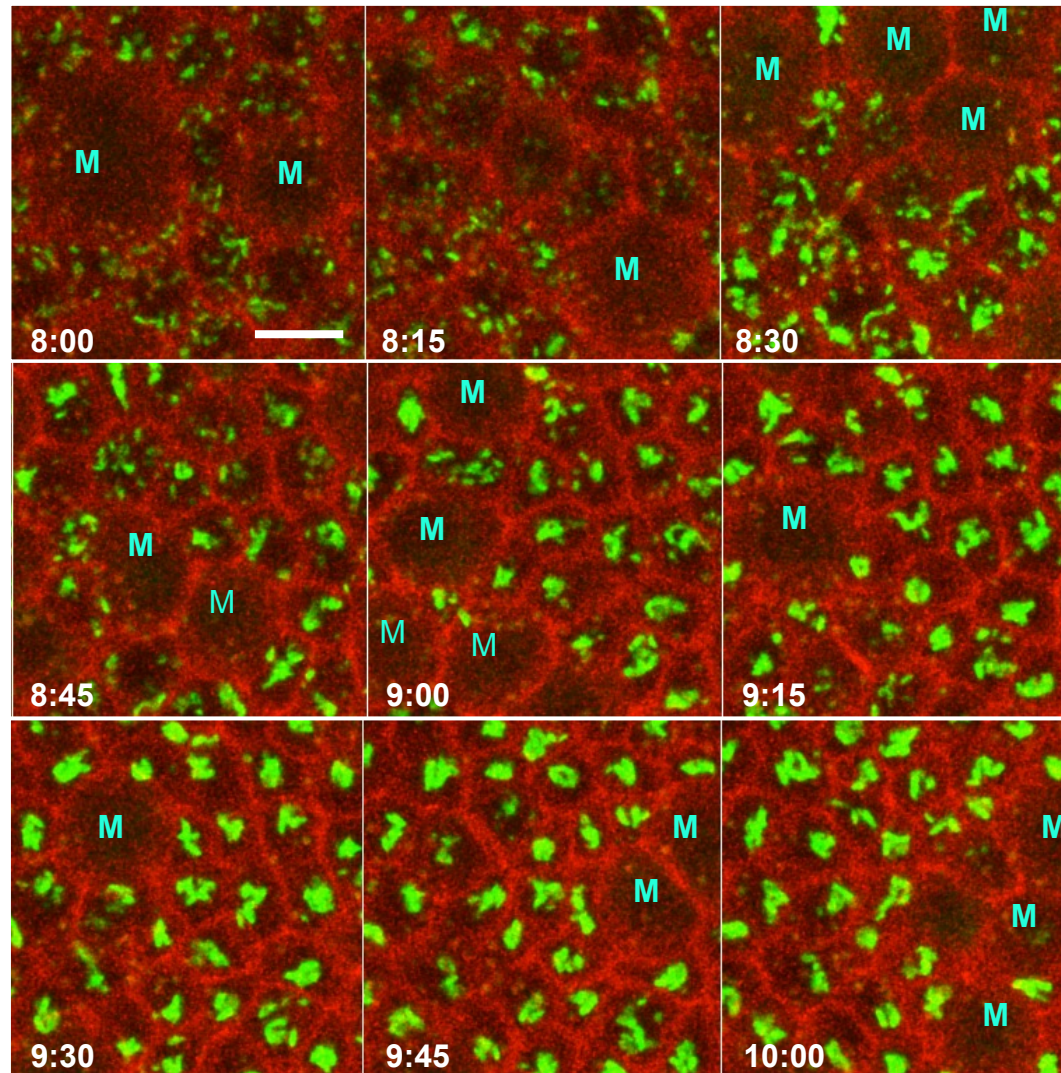

**Figure 3. Time-lapse microscopy of Golgi clustering.** mRNAs encoding reporters of the Golgi (green) and plasma membrane (red), were micro-injected in *P. lividus* zygotes, which were imaged by time-lapse microscopy at the indicated times (hpf). Note that in larger cells (labeled with M), likely undergoing mitosis, Golgi elements were barely visible, resembling the dynamics of mitotic Golgi disassembly described in mammalian cells. Scale bar: 20  $\mu$ m.

**Figure 4**

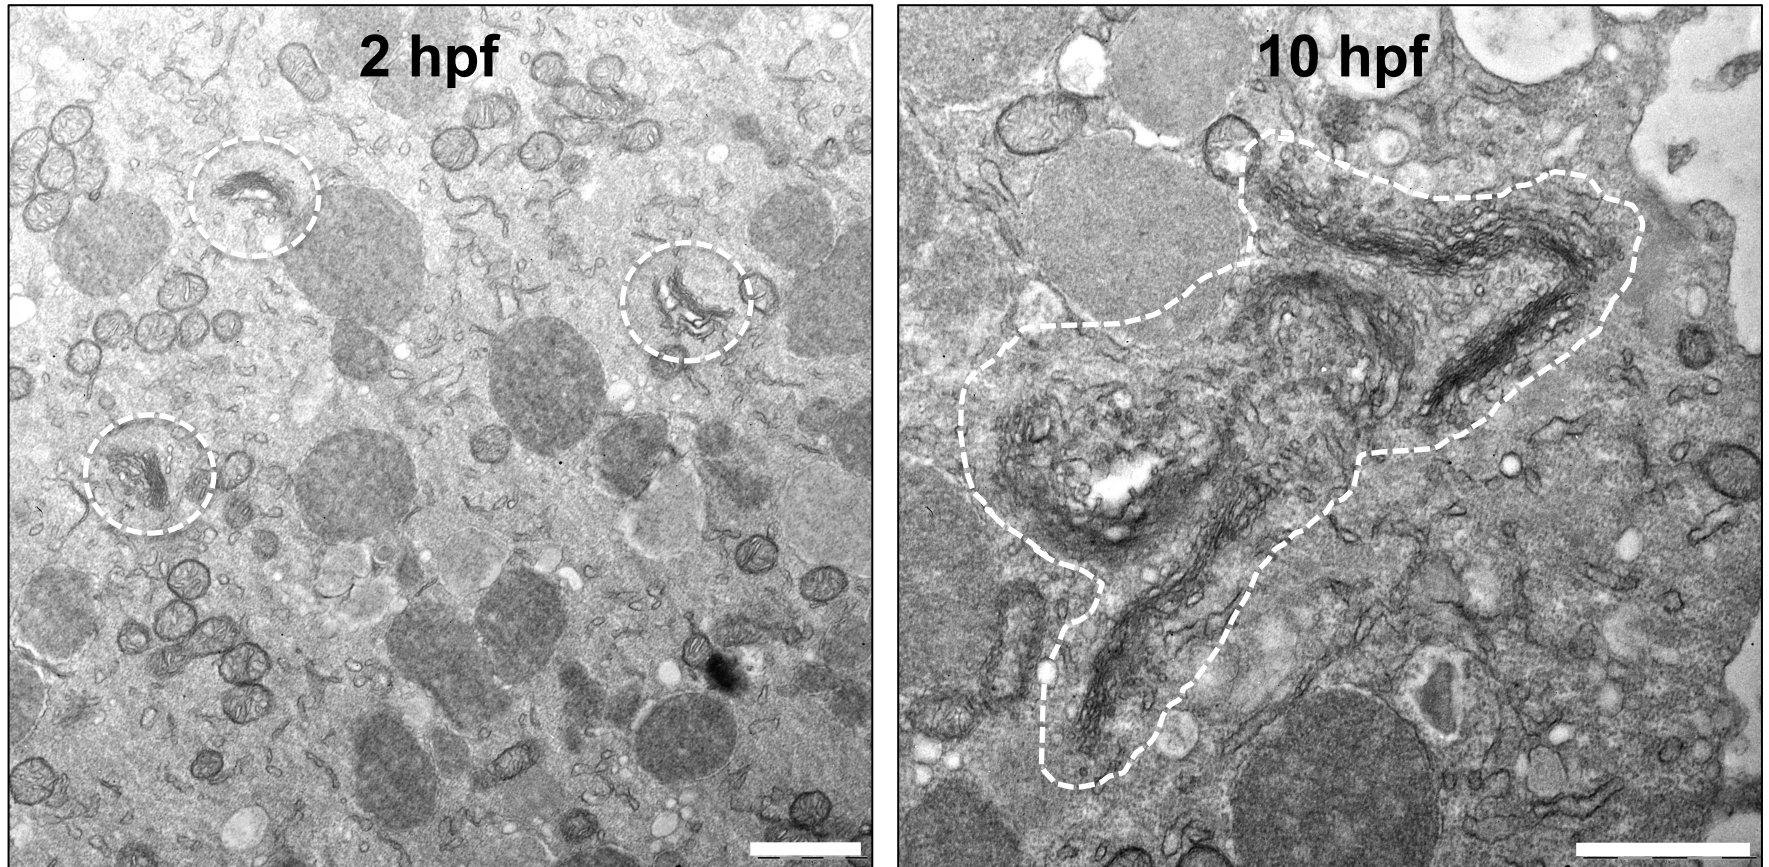

**Figure 4. Changes in Golgi structure during *P. lividus* early development.** Embryos at the indicated developmental stages were processed for electron microscopy. Golgi elements are indicated by dashed contours. Scale bars: 1  $\mu\text{m}$ .

# Figure S1

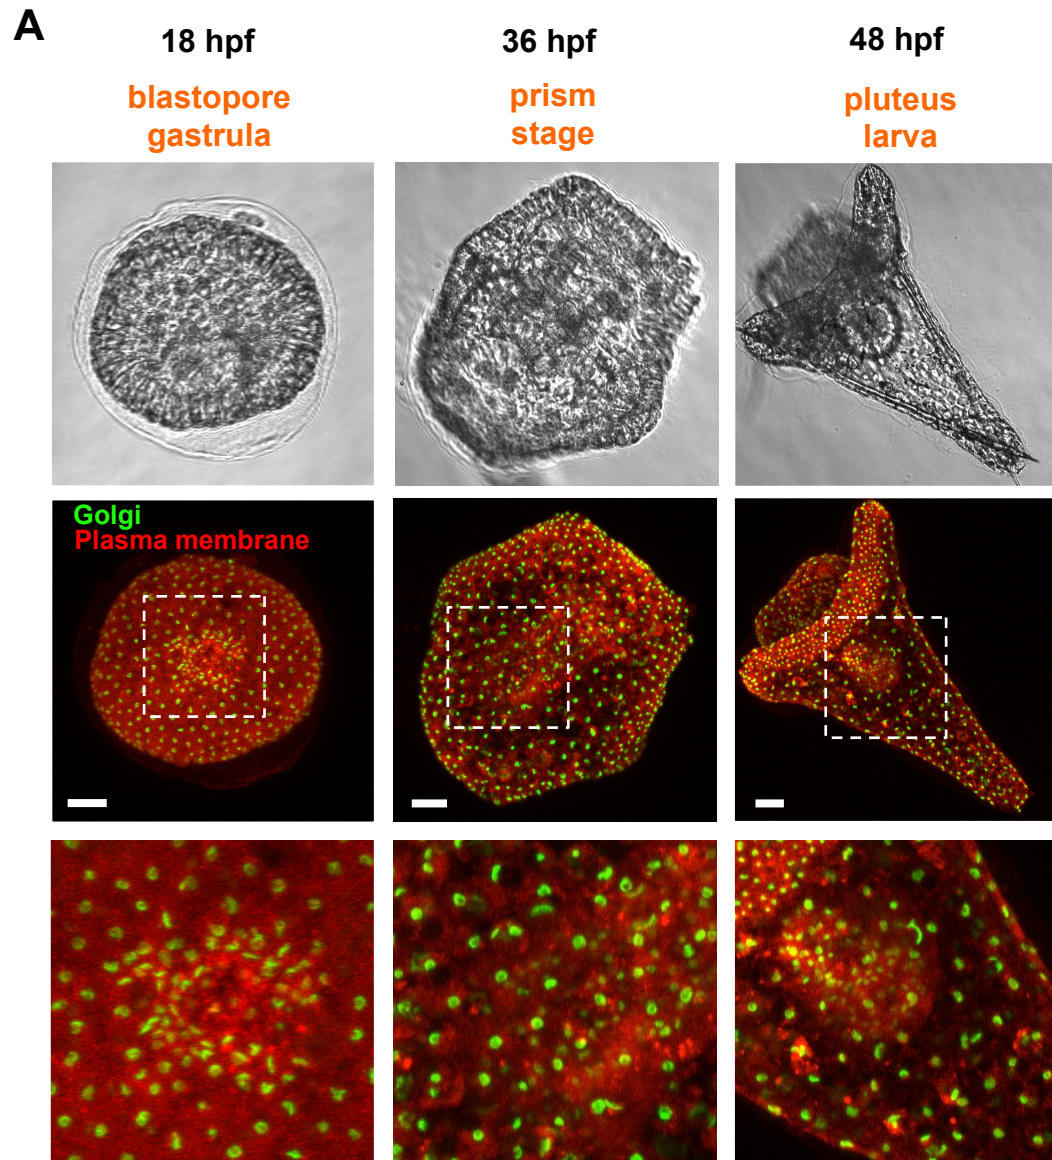

**B**

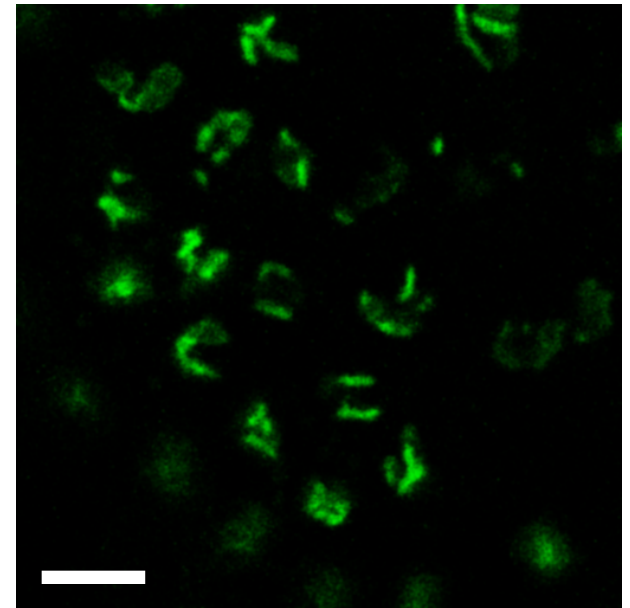

**Figure S1. Golgi dynamics during sea urchin development (continued).** (A) *P. lividus* embryos treated as described in Figure 1 and imaged at the indicated developmental stages. Scale bars: 20  $\mu\text{m}$ . (B) The Golgi apparatus in a 15 hpf *P. lividus* embryo. A single focal plane (pinhole size: 77  $\mu\text{m}$ ) acquired with a 40x water immersion objective is shown. Scale bar: 5  $\mu\text{m}$

**Figure S2**

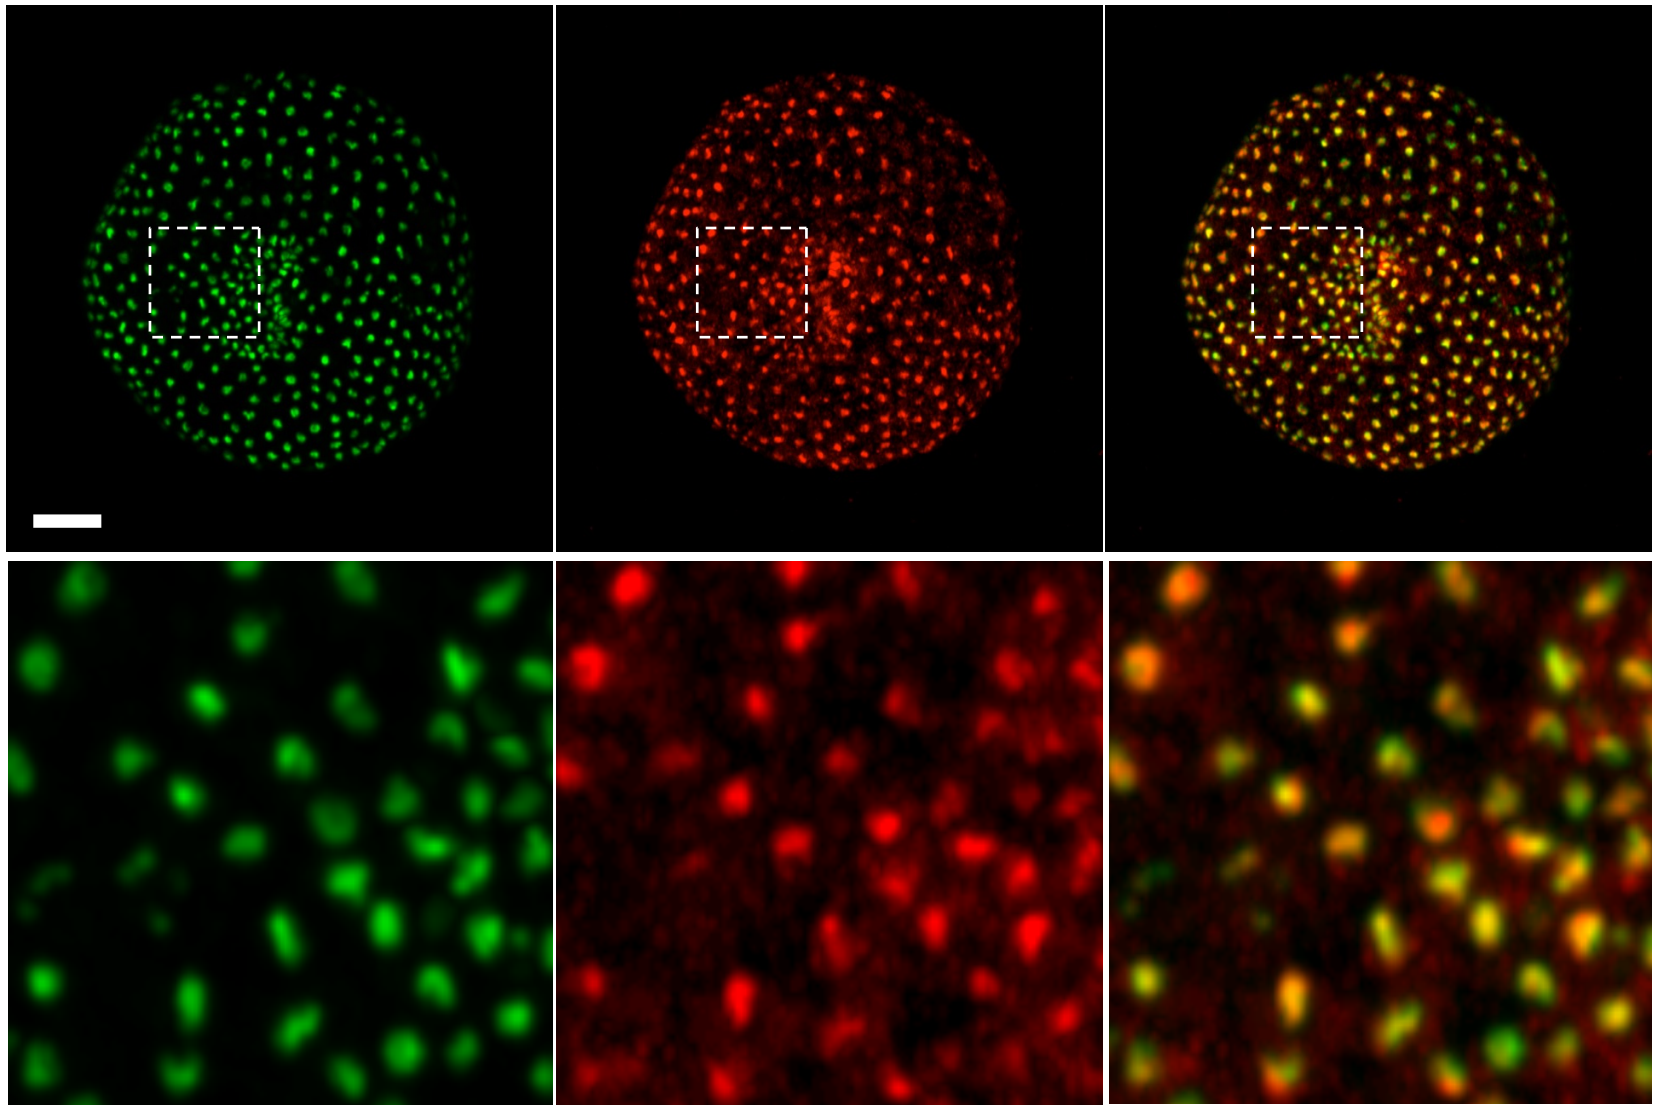

**Figure S2. validation of the EGFP-Giant-CT reporter.** EGFP\_Giant-CT and GalT\_mCherry encoding mRNAs were co-injected in *P-lividus* zygotes. Embryos were imaged at 21 hpf. The EGFP\_Giant-CT reporter co-localizes with the established GalT reporter, indicating its correct targeting to Golgi membranes. Maximum intensity projections, acquired as described in Figure 1, are shown. Bottom panels: magnifications of the upper panel insets. Scale bar: 20  $\mu$ m.
